# Supplementary material for: A Grammastola spatulata mechanotoxin-4 (GsMTx4)-sensitive cation channel mediates increased cation permeability in human hereditary spherocytosis of multiple genetic etiologies
Source: PubMed Central journal article supplement — Haematologica. 2021 Jun 10;106(10):2759–62. doi: 10.3324/haematol.2021.278770 (PMC8485688; doi:10.3324/haematol.2021.278770), 2021-06-10
Supplement: 2021_278770_VANDORPE_SUPPL.pdf [file 2021_278770_VANDORPE_SUPPL.pdf]

**A *Grammastola spatulata* mechanotoxin-4 (GsMTx4)-sensitive cation channel mediates increased cation permeability in human hereditary spherocytosis of multiple genetic etiologies**

David H. Vandorpe,<sup>1\*</sup> Boris E. Shmukler,<sup>1\*</sup> Yann Ilboudo,<sup>2</sup> Swati Bhasin,<sup>3\*</sup> Beena Thomas,<sup>3\*</sup> Alicia Rivera,<sup>4</sup> Jay G. Wohlgenuth,<sup>4</sup> Jeffrey S. Dlott,<sup>4</sup> L. Michael Snyder,<sup>4</sup> Colin Sieff,<sup>5</sup> Manoj Bhasin,<sup>3\*</sup> Guillaume Lettre,<sup>2</sup> Carlo Brugnara<sup>6</sup> and Seth L. Alper<sup>1</sup>

<sup>1</sup>Division of Nephrology and Vascular Biology Research Center, Beth Israel Deaconess Medical Center and Department of Medicine, Harvard Medical School, Boston, MA, USA; <sup>2</sup>Montreal Heart Institute and Université de Montréal, Montréal, Québec, Canada; <sup>3</sup>Division of Integrative Medicine and Vascular Biology Research Center, Beth Israel Deaconess Medical Center and Department of Medicine, Harvard Medical School, Boston, MA, USA; <sup>4</sup>Quest Diagnostics, Sea-  
caucus, NJ, USA; <sup>5</sup>Cancer and Blood Disorders Center, Dana-Farber Cancer Center and Boston Children's Hospital, and Department of Pediatrics, Harvard Medical School, Boston, MA, USA and <sup>6</sup>Department of Laboratory Medicine, Boston Children's Hospital and Department of Pathology, Harvard Medical School, Boston, MA, USA

\*DHV and BES contributed equally as co-first authors.

<sup>†</sup>Current address: Departments of Pediatrics and Biomedical Informatics, Emory University School of Medicine, Atlanta, GA, USA

Correspondence: SETH L. ALPER - [salper@bidmc.harvard.edu](mailto:salper@bidmc.harvard.edu)

doi:10.3324/haematol.2021.278770

## Supplemental Table 1 Legend.

Hematologic indices were measured by automated analysis on the ADVIA 2120 (Siemens).

Bilirubin and LDH were measured by automated analysis on the COBAS (Roche).

For candidate gene sequencing,  $\leq 1$  mg total RNA prepared from whole blood of each patient (Rneasy Kit, Qiagen) was used for first strand cDNA synthesis (Retroscrip, Ambion). Genomic DNA (gDNA) was also isolated from whole blood of each patient (Dneasy Blood and Tissue Kit, Qiagen). RT-PCR products (36-38 cycles) and/or genomic PCR products of the *SLC4A1*, *SPTB* and *ANK1* genes (36 cycles) were analyzed in 1% agarose gel. Fragments of expected size were excised, purified (QIAquick Gel Extraction Kit, Qiagen) and subjected to Sanger sequencing. Pathogenic variants were discovered in samples of patients HS3-HS6, HS8, HS9, and HS11 (Table 1).

For whole exome sequencing, gDNA (1  $\mu$ g) from whole blood of patient HS1 was fragmented by mechanical shearing (Covaris) to obtain fragments of length  $\sim$ 250 nt. DNA fragments were adenylated, adapter-ligated, and hybrid-captured, then processed for library preparation and paired-end sequencing using Novaseq 6000 at 100X coverage. Sequencing data was processed using a workflow including raw reads quality assessment by FastQC, adapter- and quality-trimming by Trimmomatic, alignment using BWA-MEM with hg19, post-alignment quality and removal of PCR duplicates by SAMtools and Picard-Tools (<http://picard.sourceforge.net>). Variants and indels were detected by GATK and annotated by ANNOVAR.

Exonic DNA fragments from 100 ng sheared gDNA from HS10 and HS12 were captured using the Illumina WES Nextera Kit. Exonic DNA fragments from HS2, HS7 and HS13 were captured using the Nimblegen SeqCap EZ Exome Capture Kit. Next-generation sequencing was conducted with an Illumina HiSeq4000 instrument using a paired-ends 2x100 base-pair protocol. Best practices pipeline recommendations for quality control and variant calling of reads were followed using the Genome Analysis Toolkit (GATK version 3.4-46) [1]. Sequenced reads were aligned to hg19 and analyzed. Variant calling was by GATK Haplotype Caller, and variant annotation was by Variant Effect Predictor (VEP)[2]. Mean target coverage was  $>91\%$ , and  $>85\%$  of bases were read at 10x coverage. Of 415,187 detected variants, 109,188 remained after selecting nonsynonymous variants with consequences matching the following terms: splice\_acceptor, splice\_donor\_variant, stop\_gained, frameshit\_variant, stop\_lost, start\_lost, protein\_altering\_variant, missense\_variant, coding\_sequence\_variant. Each pathogenic variant discovered by whole exome sequencing from patients HS1, HS2, HS7, HS10, HS12 and HS13 (Table 1) was subsequently validated by Sanger sequencing.

**Supplemental Table 1. Hemolytic indices of patients.**

| Subject #          | Genetic Dx                                                        | RBC<br>(x 10 <sup>6</sup> ) | Hb<br>(g/dL)  | Hct<br>(%)    | MCV<br>(fL)   | MCH<br>(pg)   | MCHC<br>(g/dL) | HDW<br>(g/dL) | RDW<br>(%)    | Retic<br>(%) | Retic<br>(x10 <sup>6</sup> /mL) | Bili (T/D)<br>(mg/dL) | LDH<br>(U/L)       |            |
|--------------------|-------------------------------------------------------------------|-----------------------------|---------------|---------------|---------------|---------------|----------------|---------------|---------------|--------------|---------------------------------|-----------------------|--------------------|------------|
| HS1                | SLC4A1 E68X<br>SLC4A1 R180H                                       | n.a.                        | n.a.          | n.a.          | n.a.          | n.a.          | n.a.           | n.a.          | n.a.          | n.a.         | n.a.                            | n.a.                  | n.a.               |            |
| HS2                | SLC4A1 R150X/E40K<br>Band 3 Lyon in tandem<br>w Band 3 Montefiore | 3.75                        | 12.5          | 34.7          | 92.7          | 33.5          | 36.1           | 3.38          | 15.2          | 5.0          | 0.189                           | 1.1/0.2               | 294                |            |
| HS3, HS4<br>(sibs) | SLC4A1 R490C<br>Band 3 Bicetre                                    | sib1<br>sib2                | 3.88<br>3.00  | 11.8<br>10.0  | 32.3<br>27.3  | 83.2<br>81.4  | 30.4<br>29.8   | 36.5<br>36.6  | 3.83<br>3.83  | 20.1<br>19.6 | 7.5<br>9.7                      | 0.365<br>0.326        | 2.1/0.3<br>1.5/0.2 | 287<br>398 |
| HS5                | SLC4A1 M663del<br>Band 3 Osnabruck                                | n.a.                        | n.a.          | n.a.          | n.a.          | n.a.          | n.a.           | n.a.          | n.a.          | n.a.         | n.a.                            | n.a.                  | n.a.               |            |
| HS6                | SLC4A1 R870W/K56E<br>Band 3 Prague 3                              | 4.35                        | 12.0          | 34.9          | 80.2          | 27.5          | 34.3           | 2.79          | 13.8          | 1.5          | 0.067                           | <0.1/<0.1             | 305                |            |
| HS7                | ANK1 E924X<br>SPTA1 R1074H                                        | 4.47                        | 12.9          | 34.3          | 76.7          | 28.8          | 37.5           | 4.37          | 18.5          | 2.3          | 0.105                           | 0.8/0.2               | 208                |            |
| HS8                | ANK1 A1110-G1111del                                               | 5.03                        | 12.8          | 34.8          | 69.3          | 25.5          | 36.8           | 4.44          | 18.3          | 3.0          | 0.151                           | 0.6/0.1               | 240                |            |
| HS9                | ANK1 K1140Gfs.X87<br><br>SLC4A1 P854L/K56E                        | 3.4                         | 8.8           | 24.6          | 72.4          | 25.9          | 35.8           | 4.0           | 17.7          | 5.6          | 0.190                           | 0.8/0.2               | 294                |            |
| HS10               | ANK1 E1289Gfs86X                                                  | 3.69                        | 11.6          | 30.2          | 81.9          | 31.4          | 38.4           | 4.68          | 19.5          | 10.0         | 0.369                           | 2.4/0.2               | 370                |            |
| HS11               | SPTB R1255G<br>ANK1 R619H                                         | 3.42                        | 11.1          | 31.0          | 90.4          | 32.4          | 35.9           | 3.48          | 13.9          | 4.8          | 0.140                           | 1.2/0.2               | 197                |            |
| HS12               | SPTB G1450Rfs41X                                                  | 4.20                        | 12.5          | 33.1          | 78.9          | 29.7          | 37.7           | 4.41          | 18.6          | 10.8         | 0.454                           | 2.2/0.2               | 384                |            |
| HS13               | SPTB E1815AfsX                                                    | 4.29                        | 12.1          | 32.5          | 75.8          | 28.3          | 37.3           | 4.19          | 17.5          | 10.0         | 0.429                           | 2.0/0.3               | 361                |            |
| Normal range       |                                                                   | 3.92-<br>4.72               | 11.0-<br>12.8 | 31.5-<br>36.8 | 76.8-<br>83.3 | 26.8-<br>29.4 | 34.2-<br>35.7  | 2.75-<br>3.21 | 13.2-<br>14.5 | 0.8-<br>2.0  | 0.029-<br>0.080                 | 0.3-0.0 -<br>1.2-0.4  | 110-<br>295        |            |
